1 **Atg8 is essential specifically for an autophagy-independent function in apicoplast**  
2 **biogenesis in blood-stage malaria parasites**

3

4 Marta Walczak<sup>a</sup>, Suresh M. Ganesan<sup>d,#</sup>, Jacquin C. Niles<sup>d</sup>, Ellen Yeh<sup>a,b,c,e\*</sup>

5

6 <sup>a</sup>Department of Biochemistry, <sup>b</sup>Pathology, and <sup>c</sup>Microbiology and Immunology, Stanford  
7 Medical School

8 <sup>d</sup>Department of Biological Engineering, Massachusetts Institute of Technology

9 <sup>e</sup>Chan Zuckerberg Biohub, San Francisco, CA 94158

10

11

12

13

14

15 \*Address correspondence to Ellen Yeh, [ellenyeh@stanford.edu](mailto:ellenyeh@stanford.edu)

16 # Present address: Program in Cellular and Molecular Medicine, Boston Children's Hospital,  
17 Boston-02115

18

19

20

21

## 22 **Abstract**

23 *Plasmodium* parasites and related pathogens contain an essential non-photosynthetic  
24 plastid organelle, the apicoplast, derived from secondary endosymbiosis. Intriguingly, a highly  
25 conserved eukaryotic protein, autophagy-related protein 8 (Atg8), has an autophagy-independent  
26 function in the apicoplast. Little is known about the novel apicoplast function of Atg8 and its  
27 importance in blood-stage *P. falciparum*. Using a *P. falciparum* strain in which Atg8 expression  
28 was conditionally regulated, we showed that *PfAtg8* is essential for parasite replication.  
29 Significantly, growth inhibition caused by the loss of *PfAtg8* was reversed by addition of  
30 isopentenyl pyrophosphate (IPP), which was previously shown to rescue apicoplast defects in *P.*  
31 *falciparum*. Parasites deficient in *PfAtg8*, but growth rescued by IPP, had lost their apicoplast.  
32 We designed a suite of functional assays, including a new fluorescence *in situ* hybridization  
33 (FISH) method for detection of the low-copy apicoplast genome, to interrogate specific steps in  
34 apicoplast biogenesis and detect apicoplast defects which preceded the block in parasite  
35 replication. Though protein import and membrane expansion of the apicoplast were unaffected,  
36 the apicoplast was not inherited by daughter parasites. Our findings demonstrate that, though  
37 multiple autophagy-dependent and independent functions have been proposed for *PfAtg8*, only  
38 its role in apicoplast biogenesis is essential. We propose that *PfAtg8* is required for fission or  
39 segregation of the apicoplast during parasite replication.

40

## 41 **Importance**

42 *Plasmodium* parasites, which cause malaria, and related apicomplexan parasites are  
43 important human and veterinary pathogens. They are evolutionarily distant from traditional  
44 model organisms and possess a unique plastid organelle, the apicoplast, acquired by an unusual

45 eukaryote-eukaryote endosymbiosis which established novel protein/lipid import and organelle  
46 inheritance pathways in the parasite cell. Though the apicoplast is essential for parasite survival  
47 in all stages of its life cycle, little is known about these novel biogenesis pathways. We show that  
48 malaria parasites have adapted a highly conserved protein required for macroautophagy in yeast  
49 and mammals to function specifically in apicoplast inheritance. Our finding elucidates a novel  
50 mechanism of organelle biogenesis, essential for pathogenesis, in this divergent branch of  
51 pathogenic eukaryotes.

52

53

54 *Plasmodium* (causative agent of malaria) and other apicomplexan parasites are important  
55 human and veterinary pathogens. In addition to their biomedical significance, these protozoa  
56 represent a branch of the eukaryotic tree distinct from well-studied model organisms that are the  
57 textbook examples of eukaryotic biology. As such, parasite biology often reveals startling  
58 differences that both highlight the diversity of eukaryotic cell biology and can potentially be  
59 leveraged for therapeutic development. A prime example of this unique biology is the non-  
60 photosynthetic plastid organelle, the apicoplast. It was acquired by an unusual secondary  
61 eukaryote-eukaryote endosymbiosis, in which an alga was engulfed by another eukaryote  
62 forming a new secondary plastid in the host (1). Although the apicoplast has lost photosynthetic  
63 function, it contains several metabolic pathways and is essential for parasite survival during  
64 human infection (2, 3). Despite its importance to pathogenesis, little is known about how the  
65 apicoplast coordinates its biogenesis with parasite replication.

66 *A priori* this unique apicomplexan organelle should have little to do with a highly  
67 conserved eukaryotic protein, autophagy-related protein 8 (Atg8). In model organisms, Atg8

68 plays a central role in autophagy, a conserved eukaryotic pathway for the degradation of  
69 cytoplasmic components. During autophagy, cytoplasmic cargo is sequestered in a double-  
70 membrane autophagosome which fuses with the lysosome. The ubiquitin-like Atg8 is covalently  
71 attached to phosphatidylethanolamine (PE) on the inner and outer membranes of the  
72 autophagosome (4). On the autophagosome membrane, it is required for cargo selection, *de novo*  
73 formation of the autophagosome and lysosomal fusion, and is the key marker used to identify  
74 autophagosomes (5). In fact, blood-stage *Plasmodium* parasites have been reported to  
75 accumulate Atg8<sup>+</sup> vesicles that may represent autophagosomes upon amino acid starvation (6, 7),  
76 while Atg8<sup>+</sup> autophagosome-like structures in liver-stage parasites are required for the turnover  
77 of invasion organelles (8).

78         Yet *Plasmodium* Atg8 clearly has a novel function in the apicoplast, distinct from its role  
79 in autophagy. Numerous groups independently showed that Atg8 localizes to the apicoplast in  
80 blood- and liver-stage *Plasmodium* as well as the related parasite, *Toxoplasma gondii* (6, 7, 9–  
81 12). Apicoplast localization occurs throughout the parasite replication cycle and is independent  
82 of autophagy inducers and inhibitors (7, 9, 13). This function is likely important since the  
83 apicoplast is essential for parasite replication during host infection. Indeed, while yeast and  
84 mammalian Atg8 homologs are non-essential under nutrient-replete conditions (14, 15),  
85 knockdown of Atg8 in *T. gondii* leads to a block in parasite replication with defects in apicoplast  
86 biogenesis (16). Consistent with an essential function in *Plasmodium*, Atg7, a component of the  
87 Atg8 conjugation system, is essential in blood-stage *P. falciparum* (17), while Atg8  
88 overexpression in liver-stage *P. berghei* results in non-viable parasites with apicoplast defects  
89 (8).

90 Key questions remain: Is Atg8 required for apicoplast biogenesis in the symptomatic  
91 blood stage of *Plasmodium falciparum*? It seems likely given the essentiality of *PfAtg7* and the  
92 phenotypes observed in liver-stage *P. berghei* and *T. gondii* but has not been demonstrated. What  
93 is Atg8's function in apicoplast biogenesis? The abnormal proliferation of apicoplast membranes  
94 observed in liver-stage *P. berghei* overexpressing Atg8 was attributed to its role in membrane  
95 expansion (8). Meanwhile the association of Atg8 with vesicles containing apicoplast proteins in  
96 blood-stage *P. falciparum* suggested a role in vesicle-mediated protein import into the apicoplast  
97 (6, 7) . Alternatively, *TgAtg8* was proposed to mediate the interaction of the apicoplast with  
98 the centrosome (16). Since multiple autophagy-dependent and independent Atg8 functions have  
99 been proposed, does *PfAtg8* have other functions in blood stage essential for parasite replication?  
100 For example, Atg8 may have a role in vesicle trafficking to the food vacuole, the lysosomal  
101 compartment for host hemoglobin digestion, which is essential for growth in red blood cells (6,  
102 18–20). Atg8's apicoplast function may be particularly challenging to unravel if other Atg8  
103 functions are also essential.

104 To answer these questions, we generated a *P. falciparum* strain in which Atg8 expression  
105 was conditionally regulated. We assessed parasite replication and apicoplast defects upon Atg8  
106 knockdown, taking advantage of a novel apicoplast chemical rescue only available in blood-  
107 stage *P. falciparum*. Not only is *PfAtg8* essential for blood-stage *Plasmodium* replication, its  
108 only essential function is in apicoplast biogenesis, where it is required for apicoplast inheritance.

109

## 110 **Results**

### 111 **Atg8 is essential for blood-stage *Plasmodium* replication and apicoplast function**

112 To determine whether *PfAtg8* is essential, we generated a conditional expression strain in  
113 which the endogenous *Atg8* locus was modified with a C-terminal myc tag and 3' UTR tetR-  
114 DOZI-binding aptamer sequences for regulated expression (Figure S1). As expected, *Atg8*  
115 expression was induced in the presence of anhydrotetracycline (aTC) which disrupts the tetR-  
116 DOZI repressor-aptamer interaction (*Atg8*<sup>+</sup> condition; Figure 1A and 1C) (21, 22). Though *Atg8*  
117 was detectable by antibodies against full-length protein, it was not detectable by myc antibodies  
118 (Figure S1), suggesting that the C-terminus of *Atg8* was cleaved. Removal of aTC at the  
119 beginning of the parasite replication cycle resulted in efficient knockdown with no detectable  
120 *Atg8* protein within the same cycle (Figure 1B-C). We monitored the growth of *Atg8*-deficient  
121 parasites and observed a dramatic decrease in parasitemia over 2 or more replication cycles  
122 compared to control *Atg8*<sup>+</sup> cultures (Figure 1D). These results show that *PfAtg8* is essential for  
123 parasite replication in blood-stage *P. falciparum*.

124 The growth inhibition observed in *Atg8*-deficient parasites may specifically be due to its  
125 function in the apicoplast or a result of other functions. To distinguish between essential  
126 apicoplast and non-apicoplast *Atg8* functions, we determined the growth of *Atg8*-deficient  
127 parasites in media supplemented with isopentenyl pyrophosphate (IPP). We previously showed  
128 that IPP is the only essential product of the apicoplast in blood-stage *Plasmodium*. As such, any  
129 disruption of the apicoplast, including complete loss of the organelle, can be rescued by the  
130 addition of IPP (23). IPP fully rescued the growth defect of *Atg8*-deficient parasites,  
131 demonstrating that the only essential function of *Atg8* is specific to the apicoplast (Figure 1D).  
132 *PfAtg8* may have other functions in blood-stage *Plasmodium* that are not essential but are  
133 important for parasite growth fitness, which was not assessed in this study.

134

135 **Atg8 depletion leads to apicoplast loss**

136 Each parasite contains a single apicoplast which must be replicated and inherited during  
137 cell division. To determine whether *PfAtg8* is required for apicoplast biogenesis during parasite  
138 replication, we assessed the presence of the apicoplast in *Atg8*-deficient, IPP-rescued parasites  
139 after at least 2 replication cycles when the effects of *Atg8* deficiency would be apparent (23). In  
140 the first assay, we measured the copy number of the apicoplast genome compared to the nuclear  
141 genome and detected a 10-fold decrease in the apicoplast:nuclear genome ratio (Figure 2A). In a  
142 second assay, we determined the localization of an apicoplast-targeted GFP (*ACP<sub>L</sub>*-GFP). In  
143 schizont-stage parasites expressing *Atg8*, *ACP<sub>L</sub>*-GFP localized to tubular structures which  
144 resemble the distinctive branched apicoplast in this stage. In contrast, in *Atg8*-deficient, IPP-  
145 rescued parasites *ACP<sub>L</sub>*-GFP mislocalized to cytosolic puncta, similar to what has previously  
146 been observed in parasites in which apicoplast loss has been induced by treatment with  
147 apicoplast transcription and translation inhibitors like chloramphenicol (Figure 2B-C) (23, 24).  
148 Altogether, these results indicate that the apicoplast is lost in *Atg8*-deficient parasites, likely due  
149 to a failure to replicate and inherit new apicoplasts during parasite replication.

150

151 **Atg8 depletion does not affect protein and lipid import to the apicoplast**

152 We noted that parasite growth was initially unaffected by *Atg8* knockdown but then  
153 decreased drastically in the subsequent replication cycle. As seen in Figure 1C-D, despite  
154 substantial *Atg8* depletion upon aTC removal, *Atg8*-deficient parasites invaded new host cells  
155 efficiently achieving similar parasitemia as *Atg8*<sup>+</sup> parasites in cycle 1. However, in the  
156 subsequent reinvasion (cycle 2), the parasitemia was 26% of the control. To determine whether  
157 *Atg8* depletion caused defects in apicoplast biogenesis in cycle 1 that preceded the block in

158 parasite replication in cycle 2, we monitored key events in apicoplast biogenesis in the first cycle  
159 of Atg8 knockdown (Figure 3A).

160 The first distinctive change associated with apicoplast biogenesis is growth and formation  
161 of a branched apicoplast (25, 26), which is likely dependent on protein and lipid import.  
162 Apicoplast-targeted proteins possess an *N*-terminal transit peptide sequence which targets them  
163 to the apicoplast and is removed upon import into the apicoplast (27). To assess apicoplast  
164 protein import in Atg8-deficient parasites, we monitored the processing of an imported protein,  
165 ClpP, from a 43 kDa full-length protein containing an intact transit peptide (as observed in  
166 chloramphenicol-induced apicoplast loss) to a 25 kDa mature form (28). We observed no defect  
167 in ClpP processing in trophozoite parasites ~24 hours after Atg8 knockdown (Figure 3B).  
168 Furthermore, apicoplast-targeted ACP<sub>L</sub>-GFP localized to a branched tubular structure similar to  
169 those in Atg8<sup>+</sup> parasites in schizont parasites ~32 hours after Atg8 knockdown, indicating that  
170 lipid import contributing to this extensive membrane expansion was also unaffected (Figure 3C  
171 and S2). Our data suggest that Atg8 expression is not immediately required for apicoplast protein  
172 import or membrane expansion.

173

#### 174 **Atg8 knockdown results in a late block in apicoplast inheritance**

175 The final events in apicoplast biogenesis are division of the branched apicoplast to form  
176 multiple plastids and segregation of a single apicoplast into each forming daughter parasite  
177 (merozoite). These events required for organelle inheritance have not been directly observed.  
178 Instead we assessed apicoplast inheritance upon Atg8 knockdown by detecting the presence of  
179 the apicoplast genome and apicoplast-targeted ACP<sub>L</sub>-GFP in newly reinvaded Atg8-deficient  
180 parasites (48 hours after aTC removal and ~12 hours post-invasion) after the first cycle of Atg8



181 knockdown. As noted, Atg8-deficient parasites reinvaded to similar parasitemia as Atg8+  
182 parasites in this first reinvasion (Figure 1D).

183 To detect the single-copy apicoplast genome with single cell resolution we developed a  
184 fluorescence *in-situ* hybridization (FISH) protocol using an Oligopaints library of 477 FISH  
185 probes covering >60% of the 35 kb genome (apicoplast FISH) (29, 30). As expected, a majority  
186 of Atg8+ parasites (85%) had a single fluorescent punctum corresponding to the apicoplast  
187 genome (Figure 4A-B and S3). This punctum was absent from negative-control parasites in  
188 which apicoplast loss had been induced by chloramphenicol treatment, demonstrating that  
189 apicoplast FISH was specific (Figure 4A-B) (23). In contrast to Atg8+ parasites, only 19% of  
190 reinvaded Atg8-deficient parasites contained an apicoplast genome after the first cycle of Atg8  
191 knockdown (Figure 4A-B). Since the experiments were performed on a non-clonal population,  
192 the small percentage of apicoplast FISH-positive parasites in the Atg8-deficient pool was likely  
193 due to incomplete Atg8 knockdown or unmodified wildtype parasites.

194 Similarly, we detected ACP<sub>L</sub>-GFP in individual ring-stage parasites by fluorescence  
195 microscopy (Figure 4C-D). Consistent with apicoplast FISH results, 96% Atg8+ parasites had a  
196 punctate or elongated ACP<sub>L</sub>-GFP signal, while only 18% Atg8-deficient parasites contained  
197 detectable ACP<sub>L</sub>-GFP. The presence of the apicoplast genome and protein in these early ring-  
198 stage parasites should reflect inheritance of the organelle, rather than DNA or protein synthesis,  
199 since neither genome replication nor GFP expression is active in this stage. Therefore, the  
200 decrease in apicoplast FISH and ACP<sub>L</sub>-GFP labelled structures in the progeny of Atg8-deficient  
201 parasites suggests that apicoplast inheritance was disrupted.

202

203

## 204 Discussion

205 Our findings demonstrate that *PfAtg8* has a novel, essential function in apicoplast  
206 biogenesis which is conserved among apicomplexan parasites. *PfAtg8*, like the *Atg8* homolog in  
207 *T. gondii*, is essential for parasite replication. The essentiality of apicomplexan *Atg8* contrasts  
208 with yeast and mammalian *Atg8* homologs which are not strictly required for cell growth and  
209 proliferation in nutrient-replete conditions (14, 15). Moreover, though *Atg8* has been proposed to  
210 have diverse functions in *Plasmodium* parasites from starvation-induced autophagy to stage-  
211 specific organelle turnover to intracellular vesicle trafficking (6–8), we showed that *only* its role  
212 in apicoplast biogenesis is essential for blood-stage *Plasmodium* replication. *TgAtg8*'s  
213 essentiality was also attributed to its apicoplast function since neither autophagosome biogenesis  
214 by *Atg9* nor proteolysis in the lysosomal compartment is essential in replicating tachyzoites (31–  
215 33). This unique function of *PfAtg8* may be leveraged for antimalarial drug development. Since  
216 autophagy has important roles in mammalian physiology and development, specificity for  
217 disruption of *PfAtg8* and its conjugation will be imperative. One strategy may be to identify  
218 druggable targets downstream of *PfAtg8* that specifically affect apicoplast biogenesis (15, 34),  
219 though it is unclear whether direct inhibition of *Atg8* function (as opposed to interfering with its  
220 expression) will result in the delayed growth inhibition observed in our *Atg8* knockdown strain.  
221 Finally, we determined essential *PfAtg8* functions for blood-stage *P. falciparum* growth using an  
222 *in vitro* culture system; it is possible that *Atg8* has other essential functions under *in vivo*  
223 conditions and/or in other life stages.

224 *PfAtg8* has a novel function in apicoplast biogenesis. Because *Atg8* homologs in model  
225 eukaryotes have not previously been implicated in biogenesis of mitochondria or primary  
226 chloroplasts, this function likely evolved as a result of secondary endosymbiosis in this parasite

227 lineage. The repurposing of a conserved eukaryotic protein for the biogenesis of a secondary  
228 plastid is at first surprising. However, Atg8-conjugated membranes of the apicoplast and  
229 autophagosomes both have their origins in the endomembrane system. The ER and ER-  
230 associated membranes are main membrane source of autophagosomes (35–40). Meanwhile Atg8  
231 is conjugated to the outermost of 4 apicoplast membranes (16), which derives from the host  
232 endomembrane during secondary endosymbiosis (1). Indeed, apicoplast biology has numerous  
233 tantalizing connections to ER biology. Protein import into the apicoplast requires that nuclear-  
234 encoded proteins traffic to the ER *en route* to the apicoplast (27). A translocon related to the ER-  
235 associated protein degradation (ERAD) system localizes to the apicoplast and may be involved  
236 in protein import, another example of an ER-associated membrane function that has been  
237 repurposed for apicoplast function (41–44). Finally, in some free-living protists, the secondary  
238 plastid is located within the ER with the outermost membrane of the plastid contiguous with the  
239 ER (45, 46). The endomembrane origin of the outer membrane may explain the novel function of  
240 Atg8 in apicoplast biogenesis.

241         What is the function of Atg8 on this outermost membrane? Mammalian and yeast Atg8  
242 homologs have two unique properties that contribute to their diverse autophagy-related and  
243 autophagy-independent functions. First, they stimulate membrane tethering, hemifusion, and  
244 fusion, important for their role in autophagosome formation (47, 48). Based on this membrane  
245 fusion activity, *PfAtg8* was proposed to promote membrane expansion of a growing apicoplast  
246 and/or fusion of vesicles containing nuclear-encoded proteins with the apicoplast (6–8, 10, 12,  
247 49). However, in Atg8-deficient *P. falciparum*, we did not observe any defect in either  
248 membrane expansion (assayed by formation of a branched intermediate) or protein import

249 (assayed by ClpP transit peptide processing) prior to the block in parasite replication. We  
250 therefore consider these putative functions less likely.

251         Second, ubiquitin-like Atg8 proteins are versatile protein scaffolds for membrane  
252 complexes, interacting with a variety of effector proteins, including cargo receptors, SNAREs,  
253 NSF, Rab GAPs, and microtubules (50–56). In Atg8-deficient parasites, we observed a defect in  
254 apicoplast inheritance, resulting in loss of a functional apicoplast in their progeny. We propose  
255 that *PfAtg8* is required to resolve the branched intermediate into individual apicoplasts (fission)  
256 and/or facilitate the distribution of a single apicoplast into each budding daughter parasite  
257 (segregation). Are there known Atg8 effectors that provide a model for these functions? To our  
258 knowledge, interaction of Atg8 homologs with normal-topology membrane fission machinery,  
259 such as dynamins, has not been reported (57). Mammalian Atg8 homologs, LC3 and  
260 GABARAP, have been shown to interact directly and indirectly with centrosomal proteins, albeit  
261 not conserved in apicomplexans (58–60). In *T. gondii* and another apicomplexan *Sarcocystis*  
262 *neurona*, dividing apicoplasts are associated with centrosomes, which may serve as a counting  
263 mechanism to ensure inheritance of a single apicoplast by each daughter parasite (61, 62).  
264 Notably, the association is independent of the mitotic spindle and lost upon knockdown of Atg8  
265 in *T. gondii*, suggesting that Atg8 may mediate this interaction with centrosomal proteins (16,  
266 62). Though *Plasmodium* lacks centrioles and instead contains “centrosome-like” structures,  
267 apicoplast-bound Atg8 may interact with these structures in *Plasmodium* as well (63, 64).  
268 Finally, LC3 and GABARAPs also interact with microtubules and may be required for the  
269 transport of autophagosomes and GABA receptor-containing vesicles, respectively (53, 55, 56,  
270 65). By analogy, *PfAtg8* may interact with microtubules to position the apicoplast during  
271 parasite division. Indeed, *PfAtg8* may interact with multiple effectors at the apicoplast

272 membrane, as it does on autophagosomes, to ensure organelle inheritance. Identifying these  
273 effectors will be a challenging but critical next step.

274 Atg8's function in apicoplast biogenesis is required in different life stages of *Plasmodium*  
275 spp and conserved with related apicomplexan parasites. In fact, the apicoplast function of  
276 apicomplexan Atg8 is the most consistently observed. Our results in blood-stage *Plasmodium*  
277 corroborate findings in liver-stage *Plasmodium* and *T. gondii* tachyzoites that also showed a role  
278 in apicoplast biogenesis (8, 10, 12, 16). Even autophagy, which is the “ancestral” function of  
279 Atg8, is not clearly preserved in *Plasmodium* parasites. It will be interesting to determine  
280 whether Atg8's role in apicoplast biogenesis is a specific adaptation of apicomplexan parasites or  
281 is also found in free-living relatives that possess a secondary plastid of the same origin such as  
282 *Chromera*. Overall the evolution of this new protein function for a key endosymbiotic event  
283 from an ancient template is intriguing (66).

284

## 285 **Materials and methods**

### 286 **Culture and transfection conditions**

287 *Plasmodium falciparum* parasites were grown in human erythrocytes (Research Blood  
288 Components, Boston, MA/Stanford Blood Center, Stanford, CA) at 2 % hematocrit under 5% O<sub>2</sub>  
289 and 5% CO<sub>2</sub>, at 37° C in RPMI 1640 media supplemented with 5 g/l Albumax II (Gibco), 2 g/l  
290 NaHCO<sub>3</sub> (Fisher), 25 mM HEPES pH 7.4 (Sigma), 0.1 mM hypoxanthine (Sigma) and 50 mg/l  
291 gentamicin (Gold Biotechnology) (further referred to as culture medium). For transfections, 50  
292 µg plasmid DNA were used per 200 µl packed red blood cells (RBCs), adjusted to 50%  
293 hematocrit, and electroporated as previously described (21). Parasites were selected with a  
294 combination of 2.5 mg/l blasticidin S (RPI Research Products) and 2.5 nM WR99210 (Atg8

295 TetR strain) or 2.5 mg/l blasticidin S and 500 µg/ml G418 sulfate (Corning) (ACPL-GFP  
296 expressing Atg8-TetR strain) beginning 4 days after transfection.

### 297 **Cloning and strain generation.**

298 All primers used for this study are listed in Supplementary Table 1. *P. falciparum* NF54<sup>attB</sup>  
299 parasites (kindly provided by David Fidock) engineered to continuously express Cas9 and T7  
300 RNA polymerase (NF54<sup>Cas9+T7 Polymerase</sup>) (67) were used as parental strain for deriving Atg8  
301 conditional knock down parasites.

302 The construct for inducible Atg8 expression, pSN053-Atg8, was created by cloning left and right  
303 homology arms and guide RNA into a pJazz system based vector, pSN053. The pSN053 vector  
304 contains 1) a C-terminal myc tag followed by 10x Aptamer array for anhydrotetracycline-  
305 dependent regulation of translation, 2) a TetR-DOZI cassette containing Renilla luciferase  
306 (RLuc) gene for monitoring transfection, blasticidin resistance gene for selection, and a TetR-  
307 DOZI repressor, with PfHrp2 3' and PfHsp86 5' regulatory sequences, in head-to-head  
308 orientation with the modified gene, and 3) a guide RNA expression cassette with T7 promoter  
309 and T7 terminator. The left homology arm was amplified from genomic DNA with primers  
310 SMG413+SMG425, and inserted into FseI-AsiSI site in frame with the myc tag. The right  
311 homology arm was amplified from genomic DNA with the primers SMG411+SMG412 and  
312 inserted into the I-SceI and I-CeuI sites downstream of the TetR-DOZI cassette. The guide RNA  
313 was generated by Klenow reaction from oligonucleotides SMG419 and SMG420 and inserted  
314 into the AflIII site. All ligation steps were performed using Gibson assembly. The resulting  
315 plasmid was transfected into the NF54<sup>Cas9+T7 Polymerase</sup> strain as described above and transformants  
316 were selected with 2.5 µg/l blasticidin S and 2.5 nM WR99210. Culture was maintained in 0.5  
317 µM anhydrotetracycline (aTC) (Sigma) unless stated otherwise. Transgene integration (5'

318 junction) was confirmed by PCR using primers SMG454 and SMG493. We were not able to  
319 amplify a product on the 3' junction. This strain is referred to as Atg8-TetR strain.  
320 To introduce a fluorescent apicoplast marker, GFP with an apicoplast targeting leader sequence,  
321 ACP<sub>L</sub>-GFP was amplified from pRL2-ACP<sub>L</sub>-GFP using primers mawa059 and mawa060 and  
322 cloned into AvrII-SacII restriction sites of a pY110F plasmid using InFusion (Clontech). The  
323 plasmid was transfected into Atg8-TetR strain and transformants were selected with 2.5 mg/l  
324 blasticidin S and 500 mg/l G418 sulfate. Cultures were maintained in 0.5 μM aTC and 500 mg/l  
325 G418 sulfate.

### 326 **Atg8 knock down experiments**

327 Ring stage parasites at 5-10% parasitemia were washed twice in the culture medium to remove  
328 aTC, resuspended in the culture medium and the hematocrit was adjusted to 2 %. Parasites were  
329 divided into 3 cultures grown in the culture medium supplemented with 0.5 μM aTC, without  
330 aTC, or without aTC with 200 μM IPP (Isoprenoids) for 4 replication cycles. At schizont stage  
331 of each cycle, cultures were diluted 5-fold into fresh culture media with red blood cells at 2 %  
332 hematocrit and aTC or IPP was added as required. Aliquots of culture for western blot,  
333 quantitative PCR and flow cytometry were collected at ring and/or schizont stage of each cycle,  
334 before diluting the cultures.

### 335 **Flow cytometry**

336 Parasite cultures or uninfected RBCs at 2 % hematocrit were fixed with 1% paraformaldehyde  
337 (Electron Microscopy Solutions) in PBS for 4 hours at RT or overnight at 4° C. Nuclei were  
338 stained with 50 nM YOYO-1 (Life Technologies) for minimum 1 hour at room temperature.  
339 Parasites were analyzed on the BD Accuri C6 flow cytometer. Measurements were done in  
340 technical triplicates.

341 **Western blot**

342 Parasites were lysed with 1 % saponin for 5 min on ice. Parasite pellets were washed twice with  
343 ice-cold PBS and resuspended in 20  $\mu$ l 1x LDS buffer (Life Technologies) per 1 ml culture at 2%  
344 hematocrit, 5 % parasitemia. Equal parasite numbers were loaded per lane. After separation on  
345 Bis-Tris Novex gels (Invitrogen), proteins were transferred to a nitrocellulose membrane,  
346 blocked with a buffer containing 0.1 % casein (Hammarsten, Affymetrix), 0.2x PBS and  
347 incubated with the corresponding antibodies diluted in 50% blocking buffer/50% TBST. Primary  
348 antibodies were used overnight in 1:1,000 dilution, except anti-aldolase which was used at  
349 1:10,000 and anti-GFP used at 1:20,000. Secondary antibodies were used at 1:10,000 dilution for  
350 1 hour at room temperature. Blots were visualized using Licor double-color detection system and  
351 converted to grayscale images for the purpose of this publication. Following antibodies were  
352 used: anti-Atg8, Josman LLC (see below); anti-aldolase (Abcam ab207494), anti-ClpP, a gift  
353 from W. Houry (28); anti-GFP (Clontech 632381). Fluorophore- conjugated IRDye secondary  
354 antibodies were purchased from Fisher (Licor).

355 **Quantitative PCR**

356 0.5 ml culture were lysed with 1 % saponin and washed twice with PBS. DNA was purified  
357 using the DNeasy Blood and Tissue kit (Qiagen). PCR reactions were prepared using  
358 LightCycler 480 SYBR Green I Master mix (Roche) according to manufacturer's instructions  
359 and run in triplicates on the Applied Biosystem 7900HT cycler. Primers TufA fwd and TufA rev  
360 were used for the apicoplast target, and Cht1 fwd and Cht1 rev for the nuclear target. Cycling  
361 conditions were: 95° C -10 min; 35 cycles of 95° C-30 s, 56° C-30 s, 65° C-90 s; 65°C-5 min;  
362 melting curve 65°-95° C. Data were analyzed using a delta-delta  $C_T$  method as previously  
363 described (68).



364 **Fluorescence microscopy**

365 Live or fixed parasites were stained with 2 µg/ml Hoescht 33342 stain for 15 min at room  
366 temperature to visualize nuclei. Images were acquired using the Olympus IX70 microscope  
367 equipped with a Deltavision Core system, a 100× 1.4 NA Olympus lens, a Sedat Quad filter set  
368 (Semrock) and a CoolSnap HQ CCD Camera (Photometrics) controlled via softWoRx 4.1.0  
369 software. Images were analyzed using ImageJ.

370 **Fluorescence in situ hybridization**

371 Oligopaint FISH probe library MyTag was purchased from MYcroarray (see Supplementary  
372 Table 2). The library consisted of 477 high-stringency Atto-550 conjugated probes with an  
373 overall probe density of 13.9 probes per kb of the apicoplast genome. The probes were  
374 resuspended to 10 pmol/µl in ultrapure water (stock solution).

375 The fluorescence in situ hybridization protocol was adapted from (30). Parasites were washed  
376 twice with PBS and fixed with 10 volumes of the fixation solution (4% paraformaldehyde  
377 [Electron Microscopy Solutions #50-980-487], 0.08 % glutaraldehyde [Sigma #G6257] in PBS)  
378 for 1 h at 37° C. Fixed parasites were washed twice with PBS and permeabilized with 1 % Triton  
379 X-100 in PBS for 10 min at room temperature, followed by 3 washes in PBS. Next parasites  
380 were resuspended in the hybridization solution (50% v/v formamide [Sigma], 10% dextran  
381 sulfate [Millipore], 2× SSPE [Sigma], 250 mg/ml salmon sperm DNA [Sigma]) to approx. 20%  
382 hematocrit and incubated 30 min at 37° C. MyTag probes were resuspended in the hybridization  
383 solution to a final concentration of 1 pmol/µl, denatured for 5 min at 100° C and cooled on ice.  
384 50 µl resuspended parasites were added to 20 µl hybridization solution with or without probes  
385 and incubated 30 min at 80° C followed by minimum 16 hours incubation at 37° C. Next  
386 parasites were subjected to following washes: 30 min at 37° C in 50 % (v/v) formamide, 2X SSC

387 (Sigma); 10 min at 50° C in 1X SSC; 10 min at 50° C in 2X SSC; 10 min at 50° C in 4x SSC; 10  
388 min at 50° C in PBS. Parasites were resuspended in 50 µl PBS, stained with 2 µg/ml Hoescht  
389 33342 and imaged.

### 390 **Atg8 purification and anti-Atg8 antibody production**

391 Hexahistidine-tagged Atg8 was expressed in Rosetta DE3 with rare codon plasmid from pRSF-  
392 1b-His-Atg8 (69, 70). Bacterial cultures were grown in the TB medium supplemented with 50  
393 mg/l kanamycin and 34 mg/l chloramphenicol. At OD<sub>600</sub>=3 IPTG was added to the final  
394 concentration of 300 µM to induce Atg8 expression and cultures were further grown at 20° C for  
395 16 hours. Bacteria were harvested by 20 min centrifugation at 800 g and bacterial pellets were  
396 resuspended in the buffer containing 50 mM HEPES pH 8.0, 500 mM NaCl, 1 mM MgCl<sub>2</sub>, 10 %  
397 glycerol and 2X Complete Protease Inhibitors (Pierce). Cells were lysed by a series of freeze-  
398 thaw cycles followed by passing them 3 times through the emulsifier Emulsiflex Avestin. Cell  
399 debris were removed by 30 min centrifugation at 30,000 x g. Clarified lysate was added to Talon  
400 resin (Clontech) and incubated 1 hr at 4° C. Beads were washed with the wash buffer containing  
401 50 mM HEPES pH 8.0, 150 mM NaCl, 10 mM Imidazole pH 8.0 and 10 % glycerol. Protein was  
402 eluted with the wash buffer supplemented with 300 mM Imidazole pH 8.0, dialyzed against the  
403 wash buffer lacking imidazole, aliquoted and stored at -80 °C. Anti-Atg8 antibodies were raised  
404 in a rat and a guinea pig at Josman LLC. Josman is a licensed research facility through the  
405 USDA, number 93-R-0260 and has a PHS Assurance from the OLAW of the NIH, number  
406 A3404-01.

407

408

409

410 **Funding information**

411 NIH 1K08AI097239 (Ellen Yeh)

412 Burroughs Wellcome Fund (Ellen Yeh)

413 NIH 1DP5OD012119 (Ellen Yeh)

414 Chan Zuckerberg Biohub (Ellen Yeh)

415 NIH 1DP2OD007124 (Jacquin C. Niles)

416 Bill and Melinda Gates Foundation (OPP1069759) (Jacquin C. Niles)

417 NIH P50 GM098792 (Jacquin C. Niles)

418

419 The funders had no role in study design, data collection and interpretation, or the decision to  
420 submit the work for publication.

421

422 **Acknowledgements**

423 We thank Prof Karine LeRoch for the anti-Atg8 antibody which we used to validate anti-Atg8  
424 antibodies produced in this study, Prof Walid Houry for the anti-ClpP antibody and Prof Aaron  
425 Straight for sharing the equipment. The pRSF-1b-His-Atg8 plasmid used to express His-Atg8 for  
426 immunization was a kind gift from Jürgen Bosch. We also thank Professors Pehr Harbury, Rajat  
427 Rohatgi, Lingyin Li, and Chao-Ting Wu for useful suggestions and comments on this project.

428 This research was supported by grants from NIH and Burroughs Wellcome Fund to Ellen Yeh  
429 and from NIH and Bill and Melinda Gates Foundation to Jacquin Niles. Ellen Yeh is a Chan  
430 Zuckerberg Biohub investigator.

431

432

433 **References**

- 434 1. Lim L, McFadden GI. 2010. The evolution, metabolism and functions of the apicoplast.  
435 *Philos Trans R Soc B Biol Sci* 365:749–763.
- 436 2. Ralph SA, van Dooren GG, Waller RF, Crawford MJ, Fraunholz MJ, Foth BJ, Tonkin CJ,  
437 Roos DS, McFadden GI. 2004. Tropical infectious diseases: Metabolic maps and functions of  
438 the *Plasmodium falciparum* apicoplast. *Nat Rev Microbiol* 2:203–216.
- 439 3. Mazumdar J, Wilson EH, Masek K, Hunter CA, Striepen B. 2006. Apicoplast fatty acid  
440 synthesis is essential for organelle biogenesis and parasite survival in *Toxoplasma gondii*.  
441 *Proc Natl Acad Sci* 103:13192–13197.
- 442 4. Ichimura Y, Kirisako T, Takao T, Satomi Y, Shimonishi Y, Ishihara N, Mizushima N, Tanida  
443 I, Kominami E, Ohsumi M, Noda T, Ohsumi Y. 2000. A ubiquitin-like system mediates  
444 protein lipidation. *Nature* 408:488–492.
- 445 5. Lee Y-K, Lee J-A. 2016. Role of the mammalian ATG8/LC3 family in autophagy: differential  
446 and compensatory roles in the spatiotemporal regulation of autophagy. *BMB Rep* 49:424–430.
- 447 6. Tomlins AM, Ben-Rached F, Williams RA, Proto WR, Coppens I, Ruch U, Gilberger TW,  
448 Coombs GH, Mottram JC, Müller S, Langsley G. 2013. *Plasmodium falciparum* ATG8  
449 implicated in both autophagy and apicoplast formation. *Autophagy* 9:1540–1552.
- 450 7. Cervantes S, Bunnik EM, Saraf A, Conner CM, Escalante A, Sardu ME, Ponts N,  
451 Prudhomme J, Florens L, Roch KGL. 2014. The multifunctional autophagy pathway in the  
452 human malaria parasite, *Plasmodium falciparum*. *Autophagy* 10:80–92.
- 453 8. Voss C, Ehrenman K, Mlambo G, Mishra S, Kumar KA, Sacci JB, Sinnis P, Coppens I. 2016.  
454 Overexpression of *Plasmodium berghei* ATG8 by Liver Forms Leads to Cumulative Defects  
455 in Organelle Dynamics and to Generation of Noninfectious Merozoites. *mBio* 7:e00682-16.

- 456 9. Kitamura K, Kishi-Itakura C, Tsuboi T, Sato S, Kita K, Ohta N, Mizushima N. 2012.  
457 Autophagy-Related Atg8 Localizes to the Apicoplast of the Human Malaria Parasite  
458 *Plasmodium falciparum*. PLOS ONE 7:e42977.
- 459 10. Eickel N, Kaiser G, Prado M, Burda P-C, Roelli M, Stanway RR, Heussler VT. 2013.  
460 Features of autophagic cell death in *Plasmodium* liver-stage parasites. Autophagy 9:568–580.
- 461 11. Kong-Hap MA, Mouammine A, Daher W, Berry L, Lebrun M, Dubremetz J-F, Besteiro S.  
462 2013. Regulation of ATG8 membrane association by ATG4 in the parasitic protist  
463 *Toxoplasma gondii*. Autophagy 9:1334–1348.
- 464 12. Jayabalasingham B, Voss C, Ehrenman K, Romano JD, Smith ME, Fidock DA, Bosch J,  
465 Coppens I. 2014. Characterization of the ATG8-conjugation system in 2 *Plasmodium* species  
466 with special focus on the liver stage. Autophagy 10:269–284.
- 467 13. Navale R, Atul, Allanki AD, Sijwali PS. 2014. Characterization of the Autophagy Marker  
468 Protein Atg8 Reveals Atypical Features of Autophagy in *Plasmodium falciparum*. PLoS ONE  
469 9.
- 470 14. Tsukada M, Ohsumi Y. 1993. Isolation and characterization of autophagy-defective mutants  
471 of *Saccharomyces cerevisiae*. FEBS Lett 333:169–174.
- 472 15. Mizushima N, Levine B. 2010. Autophagy in mammalian development and differentiation.  
473 Nat Cell Biol 12:823–830.
- 474 16. Lévêque MF, Berry L, Cipriano MJ, Nguyen H-M, Striepen B, Besteiro S. 2015.  
475 Autophagy-Related Protein ATG8 Has a Noncanonical Function for Apicoplast Inheritance in  
476 *Toxoplasma gondii*. mBio 6:e01446-15.

- 477 17. Walker DM, Mahfooz N, Kemme KA, Patel VC, Spangler M, Drew ME. 2013.  
478 *Plasmodium falciparum* Erythrocytic Stage Parasites Require the Putative Autophagy Protein  
479 PfAtg7 for Normal Growth. PLOS ONE 8:e67047.
- 480 18. Sinai AP, Roepe PD. 2012. Autophagy in Apicomplexa: a life sustaining death mechanism?  
481 Trends Parasitol 28:358–364.
- 482 19. Sigala PA, Goldberg DE. 2014. The Peculiarities and Paradoxes of *Plasmodium* Heme  
483 Metabolism. Annu Rev Microbiol 68:259–278.
- 484 20. Dasari P, Bhakdi S. 2012. Pathogenesis of malaria revisited. Med Microbiol Immunol  
485 (Berl) 201:599–604.
- 486 21. Ganesan SM, Falla A, Goldfless SJ, Nasamu AS, Niles JC. 2016. Synthetic RNA–protein  
487 modules integrated with native translation mechanisms to control gene expression in malaria  
488 parasites. Nat Commun 7:ncomms10727.
- 489 22. Goldfless SJ, Wagner JC, Niles JC. 2014. Versatile control of *Plasmodium falciparum* gene  
490 expression with an inducible protein-RNA interaction. Nat Commun 5:5329.
- 491 23. Yeh E, DeRisi JL. 2011. Chemical Rescue of Malaria Parasites Lacking an Apicoplast  
492 Defines Organelle Function in Blood-Stage *Plasmodium falciparum*. PLoS Biol 9.
- 493 24. Amberg-Johnson K, Hari SB, Ganesan SM, Lorenzi HA, Sauer RT, Niles JC, Yeh E. 2017.  
494 Small molecule inhibition of apicomplexan FtsH1 disrupts plastid biogenesis in human  
495 pathogens. eLife 6:e29865.
- 496 25. van Dooren GG, Marti M, Tonkin CJ, Stimmler LM, Cowman AF, McFadden GI. 2005.  
497 Development of the endoplasmic reticulum, mitochondrion and apicoplast during the asexual  
498 life cycle of *Plasmodium falciparum*. Mol Microbiol 57:405–419.

- 499 26. Stanway RR, Witt T, Zobiak B, Aepfelbacher M, Heussler VT. 2009. GFP-targeting allows  
500 visualization of the apicoplast throughout the life cycle of live malaria parasites. *Biol Cell*  
501 101:415–435.
- 502 27. Waller RF, Reed MB, Cowman AF, McFadden GI. 2000. Protein trafficking to the plastid  
503 of *Plasmodium falciparum* is via the secretory pathway. *EMBO J* 19:1794–1802.
- 504 28. El Bakkouri M, Pow A, Mulichak A, Cheung KLY, Artz JD, Amani M, Fell S, de Koning-  
505 Ward TF, Goodman CD, McFadden GI, Ortega J, Hui R, Houry WA. 2010. The Clp  
506 Chaperones and Proteases of the Human Malaria Parasite *Plasmodium falciparum*. *J Mol Biol*  
507 404:456–477.
- 508 29. Beliveau BJ, Joyce EF, Apostolopoulos N, Yilmaz F, Fonseka CY, McCole RB, Chang Y,  
509 Li JB, Senaratne TN, Williams BR, Rouillard J-M, Wu C. 2012. Versatile design and  
510 synthesis platform for visualizing genomes with Oligopaint FISH probes. *Proc Natl Acad Sci*  
511 109:21301–21306.
- 512 30. Beliveau BJ, Apostolopoulos N, Wu C. 2014. Visualizing genomes with Oligopaint FISH  
513 probes. *Curr Protoc Mol Biol Ed Frederick M Ausubel Al* 105:14.23.1-14.23.20.
- 514 31. Nguyen HM, El Hajj H, El Hajj R, Tawil N, Berry L, Lebrun M, Bordat Y, Besteiro S.  
515 2017. *Toxoplasma gondii* autophagy-related protein ATG9 is crucial for the survival of  
516 parasites in their host. *Cell Microbiol* 19:n/a-n/a.
- 517 32. Dou Z, McGovern OL, Di Cristina M, Carruthers VB. 2014. *Toxoplasma gondii* Ingests  
518 and Digests Host Cytosolic Proteins. *mBio* 5.
- 519 33. Cristina MD, Dou Z, Lunghi M, Kannan G, Huynh M-H, McGovern OL, Schultz TL,  
520 Schultz AJ, Miller AJ, Hayes BM, Linden W van der, Emiliani C, Bogyo M, Besteiro S,

- 521 Coppins I, Carruthers VB. 2017. Toxoplasma depends on lysosomal consumption of  
522 autophagosomes for persistent infection. *Nat Microbiol* 2:nmicrobiol201796.
- 523 34. Virgin HW, Levine B. 2009. Autophagy genes in immunity. *Nat Immunol* 10:461–470.
- 524 35. Ge L, Melville D, Zhang M, Schekman R. 2013. The ER–Golgi intermediate compartment  
525 is a key membrane source for the LC3 lipidation step of autophagosome biogenesis. *eLife* 2.
- 526 36. Hayashi-Nishino M, Fujita N, Noda T, Yamaguchi A, Yoshimori T, Yamamoto A. 2010.  
527 Electron tomography reveals the endoplasmic reticulum as a membrane source for  
528 autophagosome formation. *Autophagy* 6:301–303.
- 529 37. Graef M, Friedman JR, Graham C, Babu M, Nunnari J. 2013. ER exit sites are physical and  
530 functional core autophagosome biogenesis components. *Mol Biol Cell* 24:2918–2931.
- 531 38. Hamasaki M, Furuta N, Matsuda A, Nezu A, Yamamoto A, Fujita N, Oomori H, Noda T,  
532 Haraguchi T, Hiraoka Y, Amano A, Yoshimori T. 2013. Autophagosomes form at ER-  
533 mitochondria contact sites. *Nature* 495:389–393.
- 534 39. Hayashi-Nishino M, Fujita N, Noda T, Yamaguchi A, Yoshimori T, Yamamoto A. 2009. A  
535 subdomain of the endoplasmic reticulum forms a cradle for autophagosome formation. *Nat*  
536 *Cell Biol* 11:1433–1437.
- 537 40. Axe EL, Walker SA, Manifava M, Chandra P, Roderick HL, Habermann A, Griffiths G,  
538 Ktistakis NT. 2008. Autophagosome formation from membrane compartments enriched in  
539 phosphatidylinositol 3-phosphate and dynamically connected to the endoplasmic reticulum. *J*  
540 *Cell Biol* 182:685–701.
- 541 41. Agrawal S, Dooren GG van, Beatty WL, Striepen B. 2009. Genetic evidence that an  
542 endosymbiont-derived ERAD system functions in import of apicoplast proteins. *J Biol Chem*  
543 jbc.M109.044024.



- 544 42. Spork S, Hiss JA, Mandel K, Sommer M, Kooij TWA, Chu T, Schneider G, Maier UG,  
545 Przyborski JM. 2009. An Unusual ERAD-Like Complex Is Targeted to the Apicoplast of  
546 *Plasmodium falciparum*. *Eukaryot Cell* 8:1134–1145.
- 547 43. Agrawal S, Chung D-WD, Ponts N, Dooren GG van, Prudhomme J, Brooks CF, Rodrigues  
548 EM, Tan JC, Ferdig MT, Striepen B, Roch KGL. 2013. An Apicoplast Localized  
549 Ubiquitylation System Is Required for the Import of Nuclear-encoded Plastid Proteins. *PLOS*  
550 *Pathog* 9:e1003426.
- 551 44. Kalanon M, Tonkin CJ, McFadden GI. 2009. Characterization of Two Putative Protein  
552 Translocation Components in the Apicoplast of *Plasmodium falciparum*. *Eukaryot Cell*  
553 8:1146–1154.
- 554 45. Gibbs SP. 1981. The Chloroplast Endoplasmic Reticulum: Structure, Function, and  
555 Evolutionary Significance. *Int Rev Cytol* 72:49–99.
- 556 46. Cavalier-Smith T. 2002. Chloroplast Evolution: Secondary Symbiogenesis and Multiple  
557 Losses. *Curr Biol* 12:R62–R64.
- 558 47. Nakatogawa H, Ichimura Y, Ohsumi Y. 2007. Atg8, a Ubiquitin-like Protein Required for  
559 Autophagosome Formation, Mediates Membrane Tethering and Hemifusion. *Cell* 130:165–  
560 178.
- 561 48. Weidberg H, Shpilka T, Shvets E, Abada A, Shimron F, Elazar Z. 2011. LC3 and GATE-  
562 16 N Termini Mediate Membrane Fusion Processes Required for Autophagosome Biogenesis.  
563 *Dev Cell* 20:444–454.
- 564 49. Datta G, Hossain ME, Asad M, Rathore S, Mohammed A. 2017. *Plasmodium*  
565 *falciparum* OTU-like cysteine protease (PfOTU) is essential for apicoplast homeostasis and  
566 associates with noncanonical role of Atg8. *Cell Microbiol* 19:n/a-n/a.

- 567 50. Sagiv Y, Legesse-Miller A, Porat A, Elazar Z. 2000. GATE-16, a membrane transport  
568 modulator, interacts with NSF and the Golgi v-SNARE GOS-28. *EMBO J* 19:1494–1504.
- 569 51. Kittler JT, Rostaing P, Schiavo G, Fritschy J-M, Olsen R, Triller A, Moss SJ. 2001. The  
570 Subcellular Distribution of GABARAP and Its Ability to Interact with NSF Suggest a Role  
571 for This Protein in the Intracellular Transport of GABAA Receptors. *Mol Cell Neurosci*  
572 18:13–25.
- 573 52. Popovic D, Akutsu M, Novak I, Harper JW, Behrends C, Dikic I. 2012. Rab GTPase-  
574 Activating Proteins in Autophagy: Regulation of Endocytic and Autophagy Pathways by  
575 Direct Binding to Human ATG8 Modifiers. *Mol Cell Biol* 32:1733–1744.
- 576 53. Mann SS, Hammarback JA. 1994. Molecular characterization of light chain 3. A  
577 microtubule binding subunit of MAP1A and MAP1B. *J Biol Chem* 269:11492–11497.
- 578 54. Zaffagnini G, Martens S. 2016. Mechanisms of Selective Autophagy. *J Mol Biol* 428:1714–  
579 1724.
- 580 55. Pankiv S, Johansen T. 2010. FYCO1: Linking autophagosomes to microtubule plus end-  
581 directing molecular motors. *Autophagy* 6:550–552.
- 582 56. Wang H, Olsen RW. 2000. Binding of the GABAA Receptor-Associated Protein  
583 (GABARAP) to Microtubules and Microfilaments Suggests Involvement of the Cytoskeleton  
584 in GABARAPGABAA Receptor Interaction. *J Neurochem* 75:644–655.
- 585 57. Schöneberg J, Lee I-H, Iwasa JH, Hurley JH. 2017. Reverse-topology membrane scission  
586 by the ESCRT proteins. *Nat Rev Mol Cell Biol* 18:5–17.
- 587 58. Joachim J, Tooze SA. 2016. GABARAP activates ULK1 and traffics from the centrosome  
588 dependent on Golgi partners WAC and GOLGA2/GM130. *Autophagy* 12:892–893.

- 589 59. Joachim J, Razi M, Judith D, Wirth M, Calamita E, Encheva V, Dynlacht BD, Snijders AP,  
590 O'Reilly N, Jefferies HBJ, Tooze SA. 2017. Centriolar Satellites Control GABARAP  
591 Ubiquitination and GABARAP-Mediated Autophagy. *Curr Biol* 27:2123–2136.e7.
- 592 60. Watanabe Y, Honda S, Konishi A, Arakawa S, Murohashi M, Yamaguchi H, Torii S,  
593 Tanabe M, Tanaka S, Warabi E, Shimizu S. 2016. Autophagy controls centrosome number by  
594 degrading Cep63. *Nat Commun* 7:ncomms13508.
- 595 61. Striepen B, Crawford MJ, Shaw MK, Tilney LG, Seeber F, Roos DS. 2000. The Plastid of  
596 *Toxoplasma gondii* Is Divided by Association with the Centrosomes. *J Cell Biol* 151:1423–  
597 1434.
- 598 62. Vaishnava S, Morrison DP, Gaji RY, Murray JM, Entzeroth R, Howe DK, Striepen B.  
599 2005. Plastid segregation and cell division in the apicomplexan parasite *Sarcocystis neurona*. *J*  
600 *Cell Sci* 118:3397–3407.
- 601 63. Gerald N, Mahajan B, Kumar S. 2011. Mitosis in the Human Malaria Parasite *Plasmodium*  
602 *falciparum*. *Eukaryot Cell* 10:474–482.
- 603 64. Bannister LH, Hopkins JM, Fowler RE, Krishna S, Mitchell GH. 2000. Ultrastructure of  
604 rhoptry development in *Plasmodium falciparum* erythrocytic schizonts. *Parasitology* 121 ( Pt  
605 3):273–287.
- 606 65. Wang H, Bedford FK, Brandon NJ, Moss SJ, Olsen RW. 1999. GABAA-receptor-  
607 associated protein links GABAA receptors and the cytoskeleton. *Nature* 397:69–72.
- 608 66. Anderson DP, Whitney DS, Hanson-Smith V, Woznica A, Campodonico-Burnett W,  
609 Volkman BF, King N, Thornton JW, Prehoda KE. 2016. Evolution of an ancient protein  
610 function involved in organized multicellularity in animals. *eLife* 5:e10147.

- 611 67. Sidik SM, Huet D, Ganesan SM, Huynh M-H, Wang T, Nasamu AS, Thiru P, Saeij JPJ,  
612 Carruthers VB, Niles JC, Lourido S. 2016. A Genome-wide CRISPR Screen in *Toxoplasma*  
613 Identifies Essential Apicomplexan Genes. *Cell* 166:1423–1435.e12.
- 614 68. Pfaffl MW. 2001. A new mathematical model for relative quantification in real-time RT–  
615 PCR. *Nucleic Acids Res* 29:e45.
- 616 69. Hain AUP, Weltzer RR, Hammond H, Jayabalasingham B, Dinglasan RR, Graham DRM,  
617 Colquhoun DR, Coppens I, Bosch J. 2012. Structural characterization and inhibition of the  
618 *Plasmodium* Atg8–Atg3 interaction. *J Struct Biol* 180:551–562.
- 619 70. Hain AUP, Bartee D, Sanders NG, Miller AS, Sullivan DJ, Levitskaya J, Meyers CF, Bosch  
620 J. 2014. Identification of an Atg8-Atg3 Protein–Protein Interaction Inhibitor from the  
621 Medicines for Malaria Venture Malaria Box Active in Blood and Liver Stage *Plasmodium*  
622 *falciparum* Parasites. *J Med Chem* 57:4521–4531.
- 623 71. Otto TD, Wilinski D, Assefa S, Keane TM, Sarry LR, Böhme U, Lemieux J, Barrell B, Pain  
624 A, Berriman M, Newbold C, Llinás M. 2010. New insights into the blood-stage transcriptome  
625 of *Plasmodium falciparum* using RNA-Seq. *Mol Microbiol* 76:12–24.
- 626
- 627

628 **Figure Legends**

629

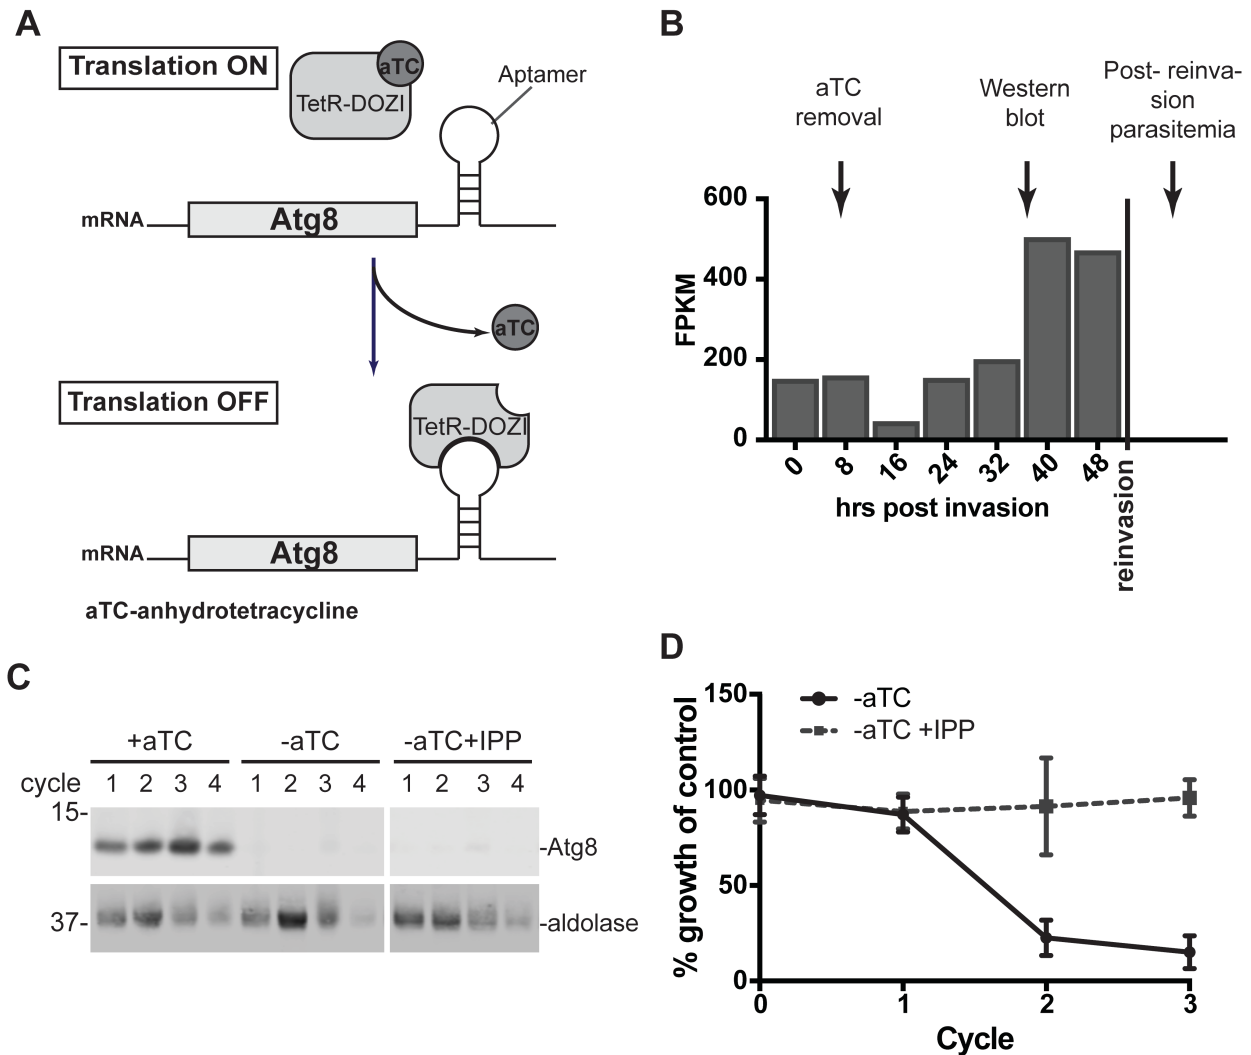

630

631 **Figure 1. Atg8 is essential for parasite replication and apicoplast function**

632 (A) Regulation of Atg8 expression by anhydrotetracycline (aTC)-dependent binding of TetR-

633 DOZI repressor. (B) Timing of aTC removal and sample collection during a single replication

634 cycle overlaid with Atg8 expression profile (71). (C) Western blot showing Atg8 knock down in

635 the presence or absence of IPP. Equal parasite numbers were loaded per lane. (D) Parasitemia of

636 ACP<sub>L</sub>-GFP expressing cultures grown for 4 cycles under the indicated conditions, normalized to

637 culture grown in the presence of aTC, i.e. expressing Atg8. Average $\pm$ SD of 3 biological  
638 replicates is shown.

639

640

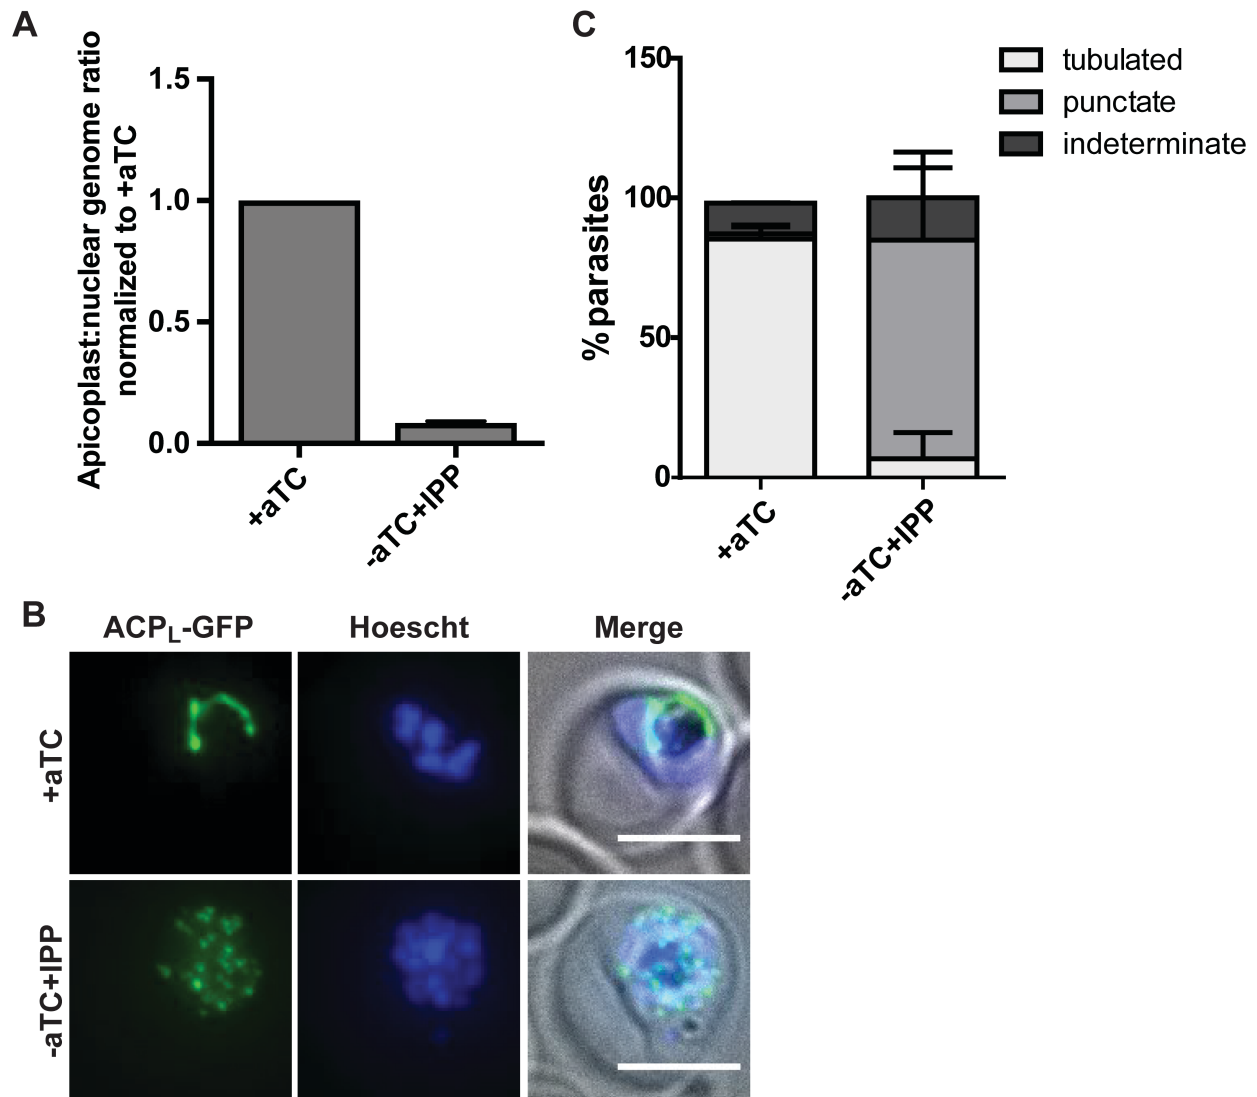

641

642 **Figure 2. Atg8 depletion leads to apicoplast lost**

643 (A) Apicoplast:nuclear genome ratio in Atg8-deficient, IPP-rescued parasites (grown for 4 cycles  
644 without aTC) measured by quantitative PCR. The ratios were normalized to Atg8+ culture (i.e.

645 grown in the presence of aTC). (B) Representative microscopy images showing localization of

646 apicoplast-targeted GFP (ACP<sub>L</sub>-GFP), in schizont-stage Atg8<sup>+</sup> or Atg8-deficient/IPP rescued  
647 parasites depleted of Atg8 for 2 replication cycles. Scale bar, 5 μm. (C) Quantification of  
648 parasites with the indicated apicoplast morphology in Atg8<sup>+</sup> or Atg8-deficient/IPP rescued  
649 parasites as shown in B. Average±SD of 2 independent experiments is shown.  
650  
651

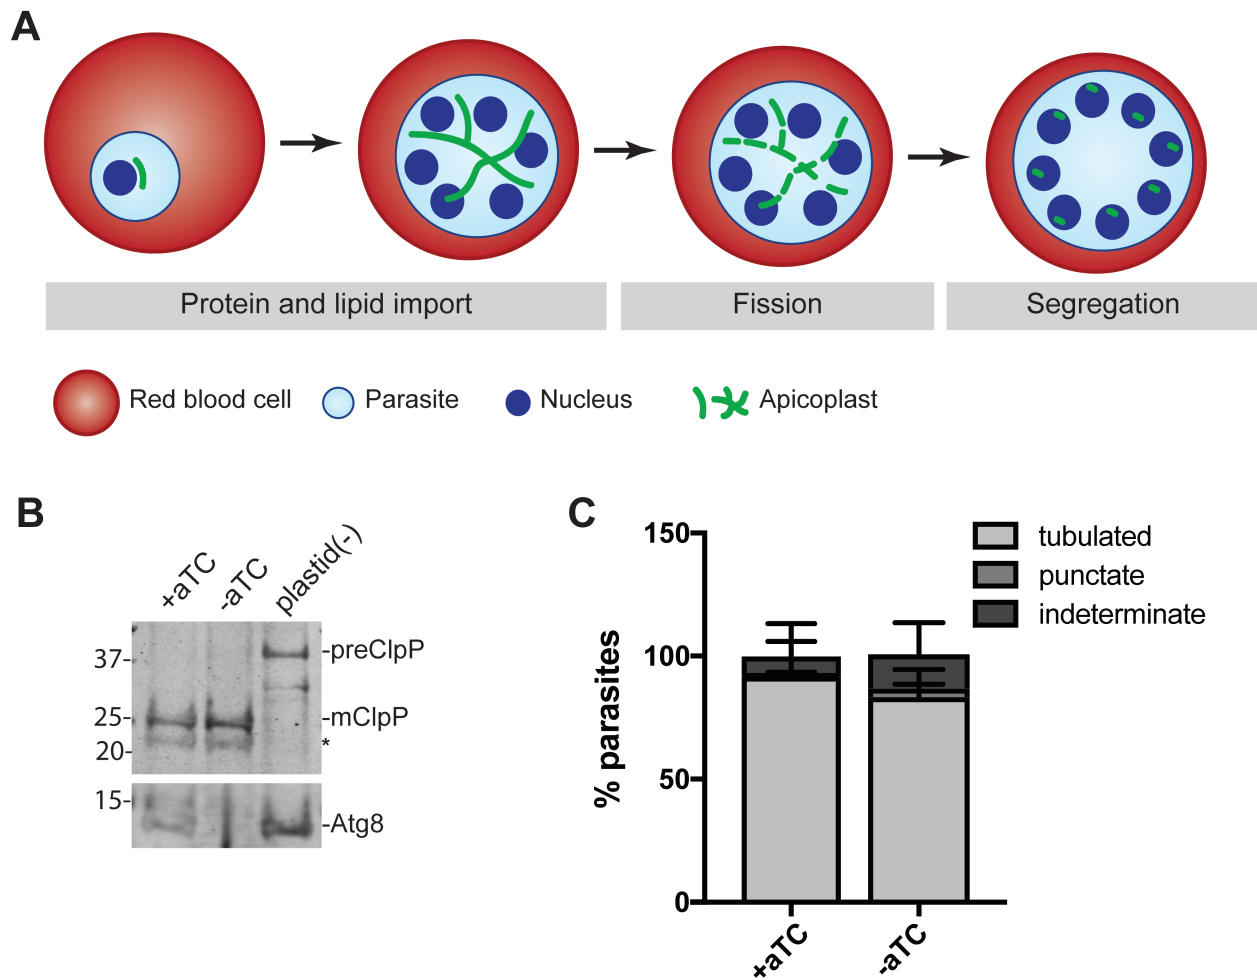

652  
653 **Figure 3. Apicoplast protein import and membrane expansion are not affected in the first**  
654 **cycle of Atg8 knockdown.**  
655 (A) Time course of molecular events during apicoplast development in blood stage parasites. (B)  
656 Processing of a luminal apicoplast protein, ClpP, in Atg8<sup>+</sup> or Atg8-deficient parasites

657 approximately 24 hrs post aTC removal. Apicoplast(-) parasites generated by chloramphenicol  
658 treatment and IPP rescue over 4 replication cycles (23), which possess only precursor ClpP, are  
659 shown for reference. preClpP, full length (precursor) form of ClpP, 43 kDa; mClpP, mature  
660 (apicoplast-luminal) ClpP, 25 kDa. The asterisk indicates a non-specific band. Atg8 expression  
661 in the corresponding time points is shown for reference. (C) Quantification of parasites with the  
662 indicated apicoplast morphology during the first cycle of Atg8 knockdown 32 hrs after aTC  
663 removal. Apicoplast was visualized using the luminal apicoplast marker, ACP<sub>L</sub>-GFP.  
664 Representative images are shown in Figure S2.  
665



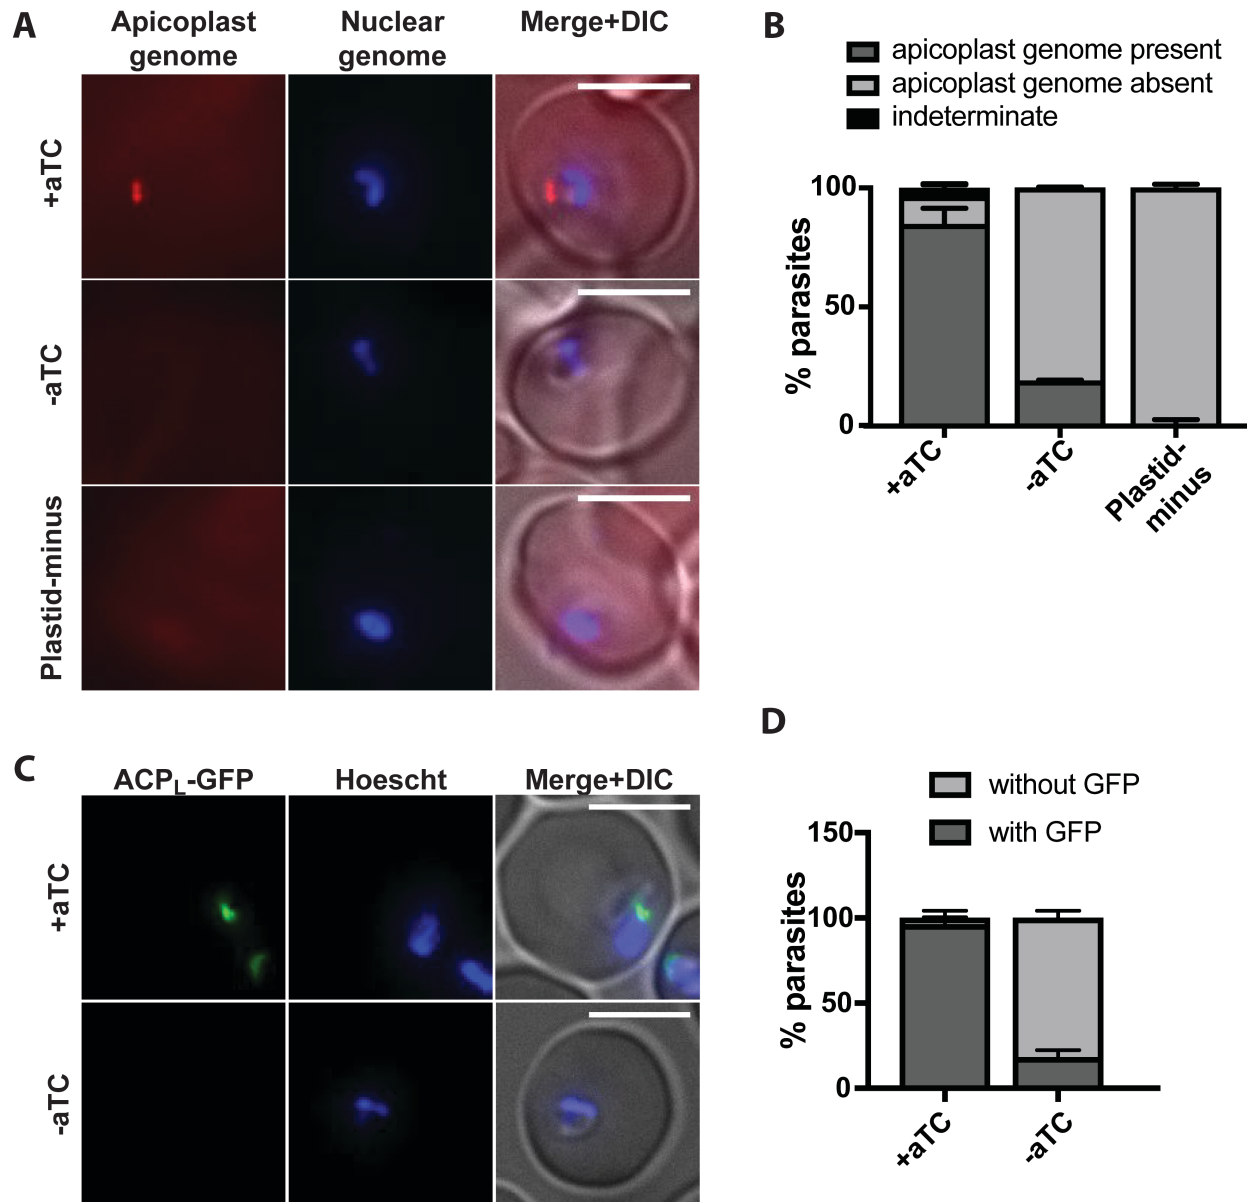

666

667 **Figure 4. Atg8 knockdown leads to defects in apicoplast inheritance.**

668 (A) Representative images of apicoplast FISH detecting the apicoplast genome in ring stage

669 Atg8<sup>+</sup>, Atg8-deficient, and apicoplast-minus parasites as a negative control for FISH staining.

670 Apicoplast-minus parasites generated by 4 cycles of chloramphenicol treatment and IPP. Scale

671 bar 5  $\mu$ m. (B) Quantification of parasites with or without apicoplast genome grown under

672 indicated conditions. Average $\pm$ SD of 2 independent experiments as in (A) is shown. (C)

673 Representative images of Atg8<sup>+</sup> or Atg8-deficient parasites (48 hrs post aTC removal)

674 expressing ACP<sub>L</sub>-GFP. Scale bar 5 μm. (D) Quantification of parasites with or without a discrete  
675 GFP-labelled structure as shown in (C) grown under indicated conditions. Average±SD of 2  
676 independent experiments is shown.
